# Supplementary material
Source: HighWire-hosted journal article supplement (https://cmajopen.ca/highwire/filestream/81399/field_highwire_adjunct_files/1/2019-0070-2-at.pdf)
Supplement: 2019-0070-2-at.pdf [file 2019-0070-2-at.pdf]

Appendix 2 (as supplied by the authors): Supplementary figure and tables

For Lab Use Only

**Ebola/VHF Risk** ([National Case Definition: Ebola Virus Disease \(EVD\) - Public Health Agency of Canada](#))  
 If patient is at risk for Viral Hemorrhagic Fever call the Medical Officer of Health (403-264-5616) immediately before testing. Alternately contact the MOC (403-770-3757) if the MOH is unavailable.

|                                                                                                                                                                              |                                                                                                                                                         |
|------------------------------------------------------------------------------------------------------------------------------------------------------------------------------|---------------------------------------------------------------------------------------------------------------------------------------------------------|
| <input type="checkbox"/> <b>ACUTE MALARIA:</b><br>Symptomatic patient only<br>Complete both Travel & Clinical History sections                                               | Patient Full Name: (first and last) _____<br>PHN# or Unique # identifier: _____<br>Ordering Physician: _____<br>Required - after hours contact #: _____ |
| <input type="checkbox"/> <b>MALARIA SCREEN:</b><br>Asymptomatic patient<br>Complete Travel history section below<br>Note: results provided within 24h of specimen collection |                                                                                                                                                         |
| <input type="checkbox"/> <b>PRE-EMPLOYMENT REQUEST</b>                                                                                                                       |                                                                                                                                                         |

| TRAVEL HISTORY                                                                                                                                                                                                                                                                                                                                                                | CLINICAL HISTORY                                                                                                                                                                                                                                                                                                                                                                               |                 |  |  |  |  |  |  |  |  |                                                                                                                                                                                                                                                                                      |
|-------------------------------------------------------------------------------------------------------------------------------------------------------------------------------------------------------------------------------------------------------------------------------------------------------------------------------------------------------------------------------|------------------------------------------------------------------------------------------------------------------------------------------------------------------------------------------------------------------------------------------------------------------------------------------------------------------------------------------------------------------------------------------------|-----------------|--|--|--|--|--|--|--|--|--------------------------------------------------------------------------------------------------------------------------------------------------------------------------------------------------------------------------------------------------------------------------------------|
| Pre-travel advice from Clinic/physician: <input type="checkbox"/> Yes <input type="checkbox"/> No                                                                                                                                                                                                                                                                             | Onset of Symptoms _____ / _____ / _____<br>YYYYY MMM DD                                                                                                                                                                                                                                                                                                                                        |                 |  |  |  |  |  |  |  |  |                                                                                                                                                                                                                                                                                      |
| Reason for travel:<br>Tourism <input type="checkbox"/> Visiting friends / relatives <input type="checkbox"/><br>Business <input type="checkbox"/> Visitor to Canada <input type="checkbox"/><br>New Immigrant <input type="checkbox"/>                                                                                                                                        | Symptoms and Signs:<br>(Check all that are present)<br>Fever / Chills / Rigors <input type="checkbox"/><br>Night Sweats <input type="checkbox"/><br>Headache <input type="checkbox"/><br>Sore Throat <input type="checkbox"/><br>Cough <input type="checkbox"/><br>Arthralgia / Myalgia <input type="checkbox"/><br>Diarrhea <input type="checkbox"/><br>Splenomegaly <input type="checkbox"/> |                 |  |  |  |  |  |  |  |  |                                                                                                                                                                                                                                                                                      |
| Countries with malaria visited: For affected countries refer to: <a href="#">Malaria Risk - Public Health Agency of Canada</a><br><table border="1"> <thead> <tr> <th>Country:</th> <th>Departure Date:</th> </tr> </thead> <tbody> <tr><td> </td><td> </td></tr> <tr><td> </td><td> </td></tr> <tr><td> </td><td> </td></tr> <tr><td> </td><td> </td></tr> </tbody> </table> | Country:                                                                                                                                                                                                                                                                                                                                                                                       | Departure Date: |  |  |  |  |  |  |  |  | Malaria Prophylaxis taken?<br>Indicate below:<br>None <input type="checkbox"/><br>Chloroquine <input type="checkbox"/><br>Mefloquine <input type="checkbox"/><br>Doxycycline <input type="checkbox"/><br>Malarone <input type="checkbox"/><br>Other (list): <input type="checkbox"/> |
| Country:                                                                                                                                                                                                                                                                                                                                                                      | Departure Date:                                                                                                                                                                                                                                                                                                                                                                                |                 |  |  |  |  |  |  |  |  |                                                                                                                                                                                                                                                                                      |
|                                                                                                                                                                                                                                                                                                                                                                               |                                                                                                                                                                                                                                                                                                                                                                                                |                 |  |  |  |  |  |  |  |  |                                                                                                                                                                                                                                                                                      |
|                                                                                                                                                                                                                                                                                                                                                                               |                                                                                                                                                                                                                                                                                                                                                                                                |                 |  |  |  |  |  |  |  |  |                                                                                                                                                                                                                                                                                      |
|                                                                                                                                                                                                                                                                                                                                                                               |                                                                                                                                                                                                                                                                                                                                                                                                |                 |  |  |  |  |  |  |  |  |                                                                                                                                                                                                                                                                                      |
|                                                                                                                                                                                                                                                                                                                                                                               |                                                                                                                                                                                                                                                                                                                                                                                                |                 |  |  |  |  |  |  |  |  |                                                                                                                                                                                                                                                                                      |
| Date of arrival in Canada _____ / _____ / _____<br>YYYYY MMM DD                                                                                                                                                                                                                                                                                                               | On Malaria Treatment: <input type="checkbox"/> No <input type="checkbox"/> Yes                                                                                                                                                                                                                                                                                                                 |                 |  |  |  |  |  |  |  |  |                                                                                                                                                                                                                                                                                      |

Questions? Call the Laboratory Information Centre at 403-770-3600

Supplementary Figure S1: A copy of the malaria history form where information regarding the cases and controls were collected from. Missing information was supplemented with data from the CLS database when available.

Supplementary Table S1: Annual incidence of malaria in Calgary by ward using the average number of cases from 2013-2017 and the 2016 population census.

| Ward | Cases | Pop    | Annual incidence per 100,000 people |
|------|-------|--------|-------------------------------------|
| 6    | 3     | 81380  | 0.737281887                         |
| 14   | 4     | 85785  | 0.932563968                         |
| 1    | 4     | 85485  | 0.935836696                         |
| 13   | 5     | 86055  | 1.162047528                         |
| 2    | 4     | 61255  | 1.306015835                         |
| 12   | 4     | 57835  | 1.38324544                          |
| 11   | 11    | 110155 | 1.997185784                         |
| 7    | 9     | 70110  | 2.567394095                         |
| 4    | 13    | 96245  | 2.701439036                         |
| 8    | 14    | 84260  | 3.323047709                         |
| 3    | 11    | 61215  | 3.593890386                         |
| 10   | 25    | 91890  | 5.441288497                         |
| 9    | 27    | 85585  | 6.309516855                         |
| 5    | 41    | 61455  | 13.34309657                         |

Supplementary Table S2: Odds ratios, 95% CIs and p-values for the multivariate regression examining the evidence for EMM between VFR status and Gender (N = 931)

| <b>Variable</b> | <b>OR (95% CIs)</b> |
|-----------------|---------------------|
| Gender          |                     |
| Female          | 1.00                |
| Male            | 2.77 (1.19 – 7.23)  |
| EMM Male & VFR  |                     |
| No              | 1.00                |
| Yes             | 0.59 (0.21 – 1.58)  |
| Reason          |                     |
| Tourist         | 1.00                |
| VFR             | 4.22 (1.93 – 10.62) |

Supplementary Table S3: Odds ratios, 95% CIs and p-values for the multivariate regression examining the evidence for EMM between VFR status and region visited (N = 931)

| <b>Variable</b> | <b>OR (95% CIs)</b> |
|-----------------|---------------------|
| Continent       |                     |
| Other           | 1.00                |
| Africa          | 8.36 (3.46 – 23.39) |
| Africa & VFR    |                     |
| No              | 1.00                |
| Yes             | 1.30 (0.41 – 3.80)  |
| Reason          |                     |
| Tourist         | 1.00                |
| VFR             | 2.39 (0.97 – 6.73)  |
